# Supplementary material for: Earlier magnetic resonance imaging-based diagnosis and prompt surgical consultation reduce medial meniscus extrusion following posterior root repair
Source: Research Square preprint supplement (doi:10.21203/rs.3.rs-8433953/v1), 2025-12-31
Supplement: Supplementary file 1 [file dea7b8555fc046382ffa7326.docx]

**Online Resource 2.** Multivariate analysis with ΔMME as the dependent variable.

|  | Multivariate analysis | |
| --- | --- | --- |
|  | t value | P value |
| Age | 1.42 | 0.161 |
| Injury/MRI | -0.817 | 0.417 |
| Injury/Surg | 4.947 | <0.001* |
| MRI/Surg | N/A | N/A |

Independent variables are as follows; age, injury‐to‐MRI (Injury/MRI), injury‐to‐surgery (Injury/Surg), and MRI‐to‐surgery (MRI/Surg) interval.

MME, Medial Meniscus Extrusion; MRI, magnetic resonance imaging.

N/A, not applicable.

*P value<0.05.
