# Supplementary material for: Earlier magnetic resonance imaging-based diagnosis and prompt surgical consultation reduce medial meniscus extrusion following posterior root repair
Source: Research Square preprint supplement (doi:10.21203/rs.3.rs-8433953/v1), 2025-12-31
Supplement: Supplementary file 2 [file ffb2d6e9d722285c04e8a3a2.docx]

**Online Resource 1.** Univariate analysis with ΔMME as the dependent variable.

|  | Univariate analysis | |  |  |  |
| --- | --- | --- | --- | --- | --- |
|  | Regression coefficient | 95% CI | SD | t value | P value |
| Age | 0.012 | 0.0010-0.023 | 0.0056 | 2.2 | 0.033* |
| Sex | 0.062 | -0.19-0.32 | 0.13 | 0.48 | 0.63 |
| BMI | 0.00049 | -0.020-0.021 | 0.010 | 0.047 | 0.96 |
| Preoperative MME | -0.0079 | -0.13-0.12 | 0.063 | -0.13 | 0.90 |
| Injury/MRI | 0.0084 | 0.0051-0.012 | 0.0016 | 5.1 | <0.001* |
| Injury/Surg | 0.0096 | 0.0071-0.012 | 0.0013 | 7.6 | <0.001* |
| MRI/Surg | 0.0095 | 0.0043-0.015 | 0.0026 | 3.7 | <0.001* |

Independent variables are as follows; age, gender, BMI, preoperative MME, injury‐to‐MRI (Injury/MRI), injury‐to‐consultation (Injury/Consult), injury‐to‐surgery (Injury/Surg), and MRI‐to‐surgery (MRI/Surg) interval.

BMI, Body Mass Index; CI, confidential interval; MME, Medial Meniscus Extrusion; MRI, magnetic resonance imaging; SD, standard deviation.

*P value<0.05.
